# Supplementary material for: Successful implementation of new technologies in nursing care: a questionnaire survey of nurse-users
Source: Springer Nature journal article supplement (doi:10.1186/1472-6947-11-67), 2011-10-27
Supplement: 12911_2011_442_MOESM2_ESM.pdf [file 12911_2011_442_MOESM2_ESM.pdf]

## *Innovation determinants*

Characteristics of the innovation

Characteristics of the adopting person (user)

Characteristics of the organisation

Characteristics of the socio-political context

Characteristics of the innovation strategy

## *Innovation process*

Dissemination

Adoption

Implementation

Continuation
